# Supplementary material for: Two-year use of flash glucose monitoring is associated with sustained improvement of glycemic control and quality of life (FLARE-NL-6)
Source: PubMed Central journal article supplement — BMJ Open Diabetes Res Care. 2021 Sep 14;9(1):e002124. doi: 10.1136/bmjdrc-2021-002124 (PMC8442047; doi:10.1136/bmjdrc-2021-002124), 2021-09-14
Supplement: bmjdrc-2021-002124supp001.pdf [file bmjdrc-2021-002124supp001.pdf]

## Supplements

**Supplementary Table 1.** Changes in glycemic control, quality of life and disease burden among persons with type 1 DM who continued FSL-FGM for at least two years and persons who had stopped FSL-FGM before the two-year follow-up period was completed

|                         | Baseline (A)      |                   | One year (B)      |                    | Two years (C)     |                   | C vs. A            |                     | C vs. B            |                    | Overall difference between groups |
|-------------------------|-------------------|-------------------|-------------------|--------------------|-------------------|-------------------|--------------------|---------------------|--------------------|--------------------|-----------------------------------|
|                         | Continued FSL-FGM | Stopped FSL-FGM   | Continued FSL-FGM | Stopped FSL-FGM    | Continued FSL-FGM | Stopped FSL-FGM   | Continued FSL-FGM  | Stopped FSL-FGM     | Continued FSL-FGM  | Stopped FSL-FGM    |                                   |
| <b>Glycemia</b>         |                   |                   |                   |                    |                   |                   |                    |                     |                    |                    |                                   |
| HbA1c                   | 62.5 (60.8, 64.2) | 58.9 (55.7, 62.2) | 58.5 (57.0, 60.1) | 56.0 (53.1, 59.0)  | 58.7 (56.8, 60.6) | 57.3 (53.6, 60.9) | -3.8 (-6.9, -0.7)  | -1.7 (-7.6, 4.2)    | 0.1 (-2.8, 3.0)    | 1.2 (-4.5, 6.9)    | 1.4 (-2.7, 5.5)                   |
| N                       | 213               | 58                | 156               | 43                 | 214               | 58                |                    |                     |                    |                    |                                   |
| Hypoglycemic events     | 66.1 (56.0, 76.3) | 73.0 (53.6, 92.4) | 60.5 (49.0, 72.0) | 85.5 (63.0, 108.0) | 52.7 (43.3, 62.2) | 52.4 (33.8, 71.1) | -13.4 (-30.3, 3.5) | -20.6 (-53.4, 12.2) | -7.8 (-25.9, 10.4) | -33.1 (-68.7, 2.6) | 0.3 (-20.6, 21.2)                 |
| N                       | 208               | 57                | 202               | 53                 | 190               | 49                |                    |                     |                    |                    |                                   |
| <b>Quality of life</b>  |                   |                   |                   |                    |                   |                   |                    |                     |                    |                    |                                   |
| EQ-5D-3L VAS            | 72.7 (70.3, 75.1) | 70.4 (65.8, 75.0) | 73.6 (70.7, 76.6) | 70.8 (65.2, 76.5)  | 75.6 (72.4, 78.8) | 72.0 (65.9, 78.2) | 2.9 (-2.0, 7.7)    | 1.6 (-7.7, 11.0)    | 2.0 (-3.3, 7.3)    | 1.2 (-9.0, 11.4)   | 3.6 (-3.3, 10.5)                  |
| N                       | 214               | 58                | 214               | 58                 | 211               | 56                |                    |                     |                    |                    |                                   |
| EQ-5D Dutch tariff      | 0.85 (0.83, 0.88) | 0.84 (0.80, 0.89) | 0.88 (0.86, 0.90) | 0.86 (0.81, 0.90)  | 0.88 (0.86, 0.91) | 0.83 (0.79, 0.88) | 0.03 (-0.01, 0.07) | -0.01 (-0.1, 0.1)   | 0.0 (-0.04, 0.04)  | -0.02 (-0.1, 0.1)  | 0.05 (0.0, 0.1)                   |
| N                       | 214               | 58                | 214               | 58                 | 211               | 56                |                    |                     |                    |                    |                                   |
| SF-12 <sup>v2</sup> PCS | 37.8 (37.0, 38.6) | 39.8 (38.2, 41.3) | 48.0 (47.0, 49.0) | 48.3 (46.3, 50.3)  | 47.7 (46.7, 48.8) | 47.1 (45.0, 49.1) | 9.9 (8.3, 11.5)    | 7.3 (4.2, 10.4)     | -0.3 (-2.1, 1.6)   | -1.2 (-4.7, 2.3)   | 0.69 (-1.6, 3.0)                  |
| N                       | 214               | 58                | 214               | 58                 | 214               | 58                |                    |                     |                    |                    |                                   |
| SF-12 <sup>v2</sup> MCS | 50.2 (48.8, 51.6) | 45.7 (43.0, 48.3) | 51.4 (50.2, 52.5) | 47.9 (45.6, 50.1)  | 50.2 (49.0, 51.4) | 44.4 (42.0, 46.7) | 0.0 (-2.2, 2.3)    | -1.3 (-5.6, 3.1)    | -1.1 (-3.2, 0.9)   | -3.5 (-7.5, 0.5)   | 5.8 (3.2, 8.5)                    |
| N                       | 214               | 58                | 209               | 55                 | 209               | 55                |                    |                     |                    |                    |                                   |
| <b>Disease burden</b>   |                   |                   |                   |                    |                   |                   |                    |                     |                    |                    |                                   |
| Hospital admissions     | 0.1 (0.1, 0.2)    | 0.1 (-0.1, 0.2)   | 0.1 (-0.001, 0.1) | 0.03 (-0.08, 0.2)  | 2.5 (-1.8, 6.7)   | 0.2 (-8.0, 8.3)   | 2.4 (-2.8, 7.6)    | 0.1 (-9.9, 10.1)    | 2.4 (-2.8, 7.6)    | 0.1 (-9.8, 10.1)   | 2.3 (-6.9, 11.5)                  |
| N                       | 214               | 58                | 214               | 58                 | 213               | 58                |                    |                     |                    |                    |                                   |
| Lost working days       | 4.5 (1.2, 7.9)    | 5.9 (-0.6, 12.4)  | 1.6 (-1.6, 4.7)   | 11.3 (5.2, 17.4)   | 4.1 (-0.9, 9.2)   | 11.2 (1.5, 20.9)  | -0.4 (-7.8, 7.0)   | 5.2 (-9.0, 19.5)    | 2.5 (-4.7, 9.8)    | -0.1 (-14.1, 13.8) | -7.1 (-18.0, 3.9)                 |
| N                       | 214               | 58                | 214               | 58                 | 211               | 58                |                    |                     |                    |                    |                                   |

Data are presented as mean (difference) with 95% confidence interval. HbA1c concentrations are presented in mmol/mol. Abbreviations: EQ-5D-3L, 3-level version of EuroQol 5D; EQ-VAS, EQ-visual analogue scale; MCS, Mental Component Score; PCS, Physical Component Score; SF-12<sup>v2</sup>, 12-Item Short Form Health Survey<sup>v2</sup>.

**Supplementary Table 2.** Changes in glycemic control, quality of life and disease burden among persons with type 2 DM who continued FSL-FGM for at least two years and persons who had stopped FSL-FGM before the two-year follow-up period was completed

|                         | Baseline (A)       |                   | One year (B)      |                   | Two years (C)     |                   | C vs. A            |                    | C vs. B           |                    | Overall difference between groups |
|-------------------------|--------------------|-------------------|-------------------|-------------------|-------------------|-------------------|--------------------|--------------------|-------------------|--------------------|-----------------------------------|
|                         | Continued FSL-FGM  | Stopped FSL-FGM   | Continued FSL-FGM | Stopped FSL-FGM   | Continued FSL-FGM | Stopped FSL-FGM   | Continued FSL-FGM  | Stopped FSL-FGM    | Continued FSL-FGM | Stopped FSL-FGM    |                                   |
| <b>Glycemia</b>         |                    |                   |                   |                   |                   |                   |                    |                    |                   |                    |                                   |
| HbA1c                   | 65.2 (59.7, 70.6)  | 62.5 (54.8, 70.1) | 59.4 (53.7, 65.1) | 62.7 (54.1, 71.3) | 62.6 (56.8, 68.5) | 52.9 (44.7, 61.1) | -2.5 (-12.1, 7.1)  | -9.6 (-23.2, 4.0)  | 3.3 (-6.6, 13.1)  | -9.8 (-24.2, 4.6)  | 9.7 (-0.3, 19.8)                  |
| N                       | 30                 | 15                | 23                | 10                | 30                | 15                |                    |                    |                   |                    |                                   |
| Hypoglycemic events     | 27.5 (15.3, 39.6)  | 36.3 (15.7, 57.0) | 37.2 (26.2, 48.3) | 22.1 (3.0, 41.2)  | 45.6 (18.9, 72.4) | 40.1 (-7.2, 87.4) | 18.1 (-17.8, 54.0) | 3.8 (-59.3, 66.9)  | 8.4 (-27.0, 43.9) | 18.0 (-44.5, 80.5) | 5.5 (-48.8, 59.9)                 |
| N                       | 26                 | 9                 | 27                | 9                 | 25                | 8                 |                    |                    |                   |                    |                                   |
| <b>Quality of life</b>  |                    |                   |                   |                   |                   |                   |                    |                    |                   |                    |                                   |
| EQ-5D-3L VAS            | 67.4 (59.8, 75.0)  | 64.4 (53.6, 75.1) | 72.3 (64.1, 80.5) | 61.1 (49.5, 72.3) | 66.5 (58.9, 75.2) | 72.2 (59.9, 84.5) | -0.9 (-14.8, 13.1) | 7.8 (-11.9, 27.5)  | -5.7 (-20.2, 8.7) | 11.1 (-9.4, 31.5)  | -5.7 (-20.7, 9.4)                 |
| N                       | 30                 | 15                | 30                | 15                | 30                | 15                |                    |                    |                   |                    |                                   |
| EQ-5D Dutch tariff      | 0.79 (-0.72, 0.86) | 0.77 (0.67, 0.87) | 0.78 (0.68, 0.87) | 0.72 (0.59, 0.85) | 0.77 (0.69, 0.89) | 0.69 (0.54, 0.83) | -0.01 (-0.2, 0.1)  | -0.08 (-0.3, 0.1)  | 0.01 (-0.2, 0.2)  | -0.03 (-0.3, 0.2)  | 0.1 (-0.07, 0.27)                 |
| N                       | 30                 | 15                | 30                | 15                | 30                | 15                |                    |                    |                   |                    |                                   |
| SF-12 <sup>v2</sup> PCS | 36.0 (34.0, 38.0)  | 35.7 (32.8, 38.5) | 42.1 (38.8, 45.5) | 41.1 (36.4, 45.8) | 43.5 (39.2, 47.8) | 41.2 (38.2, 44.3) | 5.2 (0.8, 9.7)     | 7.9 (1.6, 14.1)    | -0.9 (-6.4, 4.6)  | 2.5 (-5.3, 10.2)   | -2.3 (-7.5, 3.0)                  |
| N                       | 30                 | 15                | 30                | 15                | 30                | 15                |                    |                    |                   |                    |                                   |
| SF-12 <sup>v2</sup> MCS | 47.9 (44.1, 51.5)  | 51.2 (46.0, 56.)  | 49.4 (46.3, 52.5) | 48.1 (43.7, 52.5) | 48.8 (45.1, 52.5) | 46.8 (41.6, 52.0) | 0.9 (-5.4, 7.3)    | -4.4 (-13.4, 4.5)  | -0.5 (-6.4, 5.3)  | -1.3 (-9.6, 7.0)   | 2.0 (-4.4, 8.4)                   |
| N                       | 30                 | 15                | 30                | 15                | 30                | 15                |                    |                    |                   |                    |                                   |
| <b>Disease burden</b>   |                    |                   |                   |                   |                   |                   |                    |                    |                   |                    |                                   |
| Hospital admissions     | 0.1 (-0.02, 0.3)   | 0.0 (-0.2, 0.2)   | 0.3 (-0.03, 0.7)  | 0.0 (-0.5, 0.5)   | 0.2 (-1.3, 1.7)   | 2.5 (0.4, 4.6)    | 0.07 (-1.8, 1.9)   | 2.5 (-0.1, 5.2)    | -0.1 (-2.0, 1.8)  | 2.5 (-0.1, 5.2)    | -2.3 (-4.9, 0.3)                  |
| N                       | 30                 | 15                | 30                | 15                | 30                | 15                |                    |                    |                   |                    |                                   |
| Lost working days       | 9.4 (-1.8, 20.6)   | 4.1 (-11.8, 19.9) | 1.4 (-0.8, 3.6)   | 0.3 (-2.8, 3.3)   | 0.0 (-0.5, 0.5)   | 0.7 (-0.1, 1.4)   | -9.4 (-23.3, 4.4)  | -3.4 (-23.0, 16.2) | -1.4 (-4.1, 1.3)  | 0.4 (-3.5, 4.3)    | 0.7 (-0.3, 1.6)                   |
| N                       | 30                 | 15                | 30                | 15                | 30                | 15                |                    |                    |                   |                    |                                   |

Data are presented as mean (difference) with 95% confidence interval. HbA1c concentrations are presented in mmol/mol. Abbreviations: EQ-5D-3L, 3-level version of EuroQol 5D; EQ-VAS, EQ-visual analogue scale; MCS, Mental Component Score; PCS, Physical Component Score; SF-12<sup>v2</sup>, 12-Item Short Form Health Survey<sup>v2</sup>.

**Supplementary Table 3.** EQ-5D-3L scores among persons who continued FSL-FGM for at least two years or had stopped before the two-year follow-up period was completed

|                                                       | Baseline       |                                 |                              | Two years      |                                 |                              |
|-------------------------------------------------------|----------------|---------------------------------|------------------------------|----------------|---------------------------------|------------------------------|
|                                                       | All<br>(n=342) | Continued<br>FSL-FGM<br>(n=260) | Stopped<br>FSL-FGM<br>(n=82) | All<br>(n=331) | Continued<br>FSL-FGM<br>(n=253) | Stopped<br>FSL-FGM<br>(n=78) |
| <b>Mobility</b>                                       |                |                                 |                              |                |                                 |                              |
| No problems in walking about, n (%)                   | 277 (81.0)     | 210 (80.8)                      | 67 (81.7)                    | 262 (79.2)     | 201 (79.4)                      | 61 (78.2)                    |
| Some problems in walking about, n (%)                 | 64 (18.7)      | 49 (18.8)                       | 15 (18.3)                    | 66 (19.9)      | 49 (19.4)                       | 17 (21.8)                    |
| Confined to bed, n (%)                                | 1 (0.3)        | 1 (0.4)                         | 0 (0.0)                      | 3 (0.9)        | 3 (1.2)                         | 0 (0.0)                      |
| <b>Self-care</b>                                      |                |                                 |                              |                |                                 |                              |
| No problems with self-care, n (%)                     | 328 (95.9)     | 249 (95.8)                      | 79 (96.3)                    | 320 (96.7)     | 246 (97.2)                      | 74 (94.9)                    |
| Some problems with washing or dressing, n (%)         | 12 (3.5)       | 9 (3.5)                         | 3 (3.7)                      | 8 (2.4)        | 5 (2.0)                         | 3 (3.8)                      |
| Unable to wash or dress myself, n (%)                 | 2 (0.6)        | 2 (0.8)                         | 0 (0.0)                      | 3 (0.9)        | 2 (0.8)                         | 1 (1.3)                      |
| <b>Usual activities</b>                               |                |                                 |                              |                |                                 |                              |
| No problems with performing usual activities, n (%)   | 225 (65.8)     | 175 (67.3)                      | 50 (61.0)                    | 234 (70.7)     | 180 (71.5)                      | 54 (69.2)                    |
| Some problems with performing usual activities, n (%) | 115 (33.6)     | 84 (32.3)                       | 31 (37.8)                    | 95 (28.7)      | 72 (28.7)                       | 23 (29.5)                    |
| Unable to perform usual activities, n (%)             | 2 (0.6)        | 1 (0.4)                         | 1 (1.2)                      | 2 (0.6)        | 1 (0.4)                         | 1 (1.3)                      |
| <b>Pain / discomfort</b>                              |                |                                 |                              |                |                                 |                              |
| No pain or discomfort, n (%)                          | 206 (60.2)     | 159 (61.2)                      | 47 (57.3)                    | 202 (61.0)     | 161 (63.6)                      | 41 (52.6)                    |
| Moderate pain or discomfort, n (%)                    | 127 (37.1)     | 94 (36.2)                       | 33 (40.2)                    | 118 (35.6)     | 85 (33.6)                       | 33 (42.3)                    |
| Extreme pain or discomfort, n (%)                     | 9 (2.6)        | 7 (2.7)                         | 2 (2.4)                      | 11 (3.3)       | 7 (2.8)                         | 4 (5.1)                      |
| <b>Anxiety / depression</b>                           |                |                                 |                              |                |                                 |                              |
| Not anxious or depressed, n (%)                       | 252 (73.7)     | 196 (75.4)                      | 56 (68.3)                    | 254 (76.7)     | 208 (82.2)                      | 46 (59.0)                    |
| Moderately anxious or depressed, n (%)                | 86 (25.1)      | 61 (23.5)                       | 25 (30.5)                    | 75 (22.7)      | 44 (17.4)                       | <b>31 (39.7)*</b>            |
| Extremely anxious or depressed, n (%)                 | 4 (1.2)        | 3 (1.2)                         | 1 (1.2)                      | 2 (0.6)        | 1 (0.4)                         | 1 (1.3)                      |

Data are presented as number (%). Abbreviations: IQR, Interquartile Range. Significant outcome presented in bold. \*  $p < 0.001$  as compared to persons who continued FSL-FGM.

**Supplementary Table 4.** Changes in the percentage of persons who reported hypoglycemic events, hospital admissions and lost working days among persons who continued FSL-FGM for at least two years and persons who had stopped FSL-FGM before the two-year follow-up period was completed

|                                                              | Baseline                  |                        | One year                  |                        | Two years                 |                        |
|--------------------------------------------------------------|---------------------------|------------------------|---------------------------|------------------------|---------------------------|------------------------|
|                                                              | Continued FSL-FGM (n=260) | Stopped FSL-FGM (n=82) | Continued FSL-FGM (n=260) | Stopped FSL-FGM (n=82) | Continued FSL-FGM (n=260) | Stopped FSL-FGM (n=82) |
| <b>Glycemia</b>                                              |                           |                        |                           |                        |                           |                        |
| Presence of any hypoglycemic event past 6 months, yes, n (%) | 250 (96.2)                | 75 (91.5)              | 242 (93.1)                | <b>69 (84.1)*</b>      | 230 (88.5)                | <b>65 (79.3)*</b>      |
| <b>Disease burden</b>                                        |                           |                        |                           |                        |                           |                        |
| Hospital admission past 12 months, yes, n (%)                | 21 (8.1)                  | 6 (7.3)                | 11 (4.2)                  | 2 (2.4)                | 14 (5.4)                  | <b>10 (12.2)*</b>      |
| Work absenteeism past 6 months, yes, n (%)                   | 39 (15.0)                 | 16 (19.5)              | 11 (4.2)                  | 8 (9.8)                | 13 (5.0)                  | <b>12 (14.6)**</b>     |

Data are presented as number (%). Significant outcomes presented in bold. \* $p < 0.05$  as compared to persons who continued FSL-FGM. \*\* $p < 0.001$  as compared to persons who continued FSL-FGM.

**Supplementary Table 5.** Selected results of Diabetes Vereniging Nederland patient-reported outcome measures (DVN-PROM) questionnaire comparing persons who continued FSL-FGM and persons who had stopped FSL-FGM before the two-year follow-up period was completed

|                                                                                       | <b>Continued FSL-FGM<br/>(n=254)</b> | <b>Stopped<br/>FSL-FGM<br/>(n=79)</b> |
|---------------------------------------------------------------------------------------|--------------------------------------|---------------------------------------|
| Hypoglycemic episodes are less severe, n (%)                                          | 208 (81.9)                           | 9 (11.4)*                             |
| Better understanding of glucose fluctuations, n (%)                                   | 240 (94.5)                           | 6 (7.6)*                              |
| Feeling more secure since using FSL-FGM (or stopping, respectively), n (%)            | 196 (77.2)                           | 7 (8.9)*                              |
| Performing more frequent adjustments of insulin doses, n (%)                          | 208 (81.9)                           | 24 (30.4)*                            |
| Always measuring glucose before participating in traffic as a driver, n (%)           | 166 (65.4)                           | 31 (39.2)*                            |
| Sporting and exercising more frequently, n (%)                                        | 109 (42.9)                           | 3 (3.8)*                              |
| House mates and family members are less worried about their glucose regulation, n (%) | 165 (65.0)                           | 7 (9.0)*                              |

Data are presented as number (%). \*  $p < 0.0001$  as compared to persons who continued FSL-FGM.

**Supplementary Table 6.** Changes in scores on the SF-12 subscales among persons who continued FSL-FGM for at least two years and persons who had stopped FSL-FGM before the two-year follow-up period was completed

|                      | Baseline (A)      |                   | One year (B)      |                   | Two years (C)     |                   | C vs. A           |                   | C vs. B           |                   | Overall difference between groups |
|----------------------|-------------------|-------------------|-------------------|-------------------|-------------------|-------------------|-------------------|-------------------|-------------------|-------------------|-----------------------------------|
|                      | Continued FSL-FGM | Stopped FSL-FGM   |                                   |
| Physical functioning | 80.2 (77.0, 83.4) | 84.2 (78.5, 89.9) | 82.8 (79.6, 86.0) | 83.5 (77.8, 89.3) | 82.9 (79.8, 86.0) | 82.3 (76.7, 87.9) | 2.7 (-2.8, 8.1)   | -1.9 (-11.7, 7.9) | 0.1 (-5.3, 5.5)   | -1.3 (-11.0, 8.5) | 0.6 (-5.8, 7.0)                   |
| N                    | 254               | 79                | 254               | 79                | 254               | 79                |                   |                   |                   |                   |                                   |
| Role physical        | 62.7 (60.0, 65.4) | 59.8 (54.9, 64.7) | 71.3 (68.5, 74.1) | 62.0 (57.1, 67.0) | 68.2 (65.4, 71.1) | 59.5 (54.4, 64.6) | 5.5 (0.7, 10.3)   | -0.3 (-9.0, 8.3)  | -3.1 (-8.0, 1.8)  | -2.5 (-11.2, 6.2) | 8.7 (2.9, 14.6)                   |
| N                    | 254               | 79                | 254               | 79                | 254               | 79                |                   |                   |                   |                   |                                   |
| Role emotional       | 75.0 (72.2, 77.8) | 69.0 (64.0, 74.0) | 80.3 (77.7, 83.0) | 67.4 (62.6, 72.2) | 77.7 (75.0, 80.4) | 66.5 (61.6, 71.3) | 2.7 (-2.0, 7.5)   | -2.5 (-11.1, 6.0) | -2.6 (-7.2, 2.0)  | -0.9 (-9.3, 7.4)  | 11.3 (5.7, 16.8)                  |
| N                    | 254               | 79                | 254               | 79                | 254               | 79                |                   |                   |                   |                   |                                   |
| Mental health        | 69.1 (66.9, 71.3) | 67.9 (64.0, 71.8) | 75.8 (73.8, 77.8) | 73.4 (69.8, 77.0) | 74.7 (72.7, 76.7) | 67.4 (63.7, 71.1) | 5.6 (2.0, 9.3)    | -0.5 (-7.0, 6.1)  | -1.1 (-4.6, 2.3)  | -6.0 (-12.3, 0.2) | 7.3 (3.1, 11.5)                   |
| N                    | 254               | 79                | 254               | 79                | 254               | 79                |                   |                   |                   |                   |                                   |
| Bodily pain          | 83.3 (80.5, 86.0) | 83.2 (78.3, 88.2) | 14.2 (11.4, 16.9) | 17.4 (12.5, 22.4) | 85.7 (83.1, 88.3) | 81.0 (76.4, 85.7) | 2.5 (-2.2, 7.1)   | -2.2 (-10.5, 6.1) | 71.6 (66.9, 76.2) | 63.6 (55.3, 71.9) | 4.7 (-0.6, 10.0)                  |
| N                    | 254               | 79                | 254               | 79                | 254               | 79                |                   |                   |                   |                   |                                   |
| General health       | 47.1 (44.9, 49.4) | 48.1 (44.1, 52.1) | 52.1 (49.8, 54.3) | 50.3 (46.3, 54.3) | 51.0 (48.6, 53.4) | 49.1 (44.8, 53.3) | 3.8 (-0.1, 7.8)   | 0.9 (-6.1, 8.0)   | -1.1 (-5.0, 2.9)  | -1.3 (-8.4, 5.8)  | 1.9 (-2.9, 6.8)                   |
| N                    | 254               | 79                | 254               | 79                | 254               | 79                |                   |                   |                   |                   |                                   |
| Vitality             | 59.2 (56.5, 61.8) | 58.5 (53.7, 63.3) | 64.6 (61.9, 67.2) | 63.6 (58.9, 68.3) | 63.4 (60.7, 66.1) | 57.3 (52.5, 62.1) | 4.2 (-0.4, 8.8)   | -1.3 (-9.5, 7.0)  | -1.2 (-5.7, 3.4)  | -6.3 (-14.5, 1.9) | 6.1 (0.6, 11.6)                   |
| N                    | 254               | 79                | 254               | 79                | 254               | 79                |                   |                   |                   |                   |                                   |
| Social functioning   | 72.3 (69.3, 75.4) | 69.3 (63.9, 74.7) | 82.1 (79.3, 84.9) | 75.9 (70.9, 81.0) | 79.1 (76.1, 82.1) | 68.7 (63.3, 74.1) | 6.8 (1.6, 12.0)   | -0.6 (-10.0, 8.7) | -3.0 (-8.0, 2.1)  | -7.3 (-16.3, 1.8) | 10.5 (4.3, 16.7)                  |
| N                    | 254               | 79                | 254               | 79                | 254               | 79                |                   |                   |                   |                   |                                   |

Data are presented as mean (difference) with 95% confidence interval. SF-12<sup>v2</sup>, 12-Item Short Form Health Survey<sup>v2</sup>.
